# Supplementary material for: Oleoylethanolamide inhibits α-melanocyte stimulating hormone-stimulated melanogenesis via ERK, Akt and CREB signaling pathways in B16 melanoma cells
Source: PubMed Central journal article supplement (PMC5593609; doi:10.18632/oncotarget.18097), 2017-05-23
Supplement: oncotarget-08-56868-s001.pdf [file oncotarget-08-56868-s001.pdf]

## Oleylethanolamide inhibits $\alpha$ -melanocyte stimulating hormone-stimulated melanogenesis via ERK, Akt and CREB signaling pathways in B16 melanoma cells

### Supplementary Figures

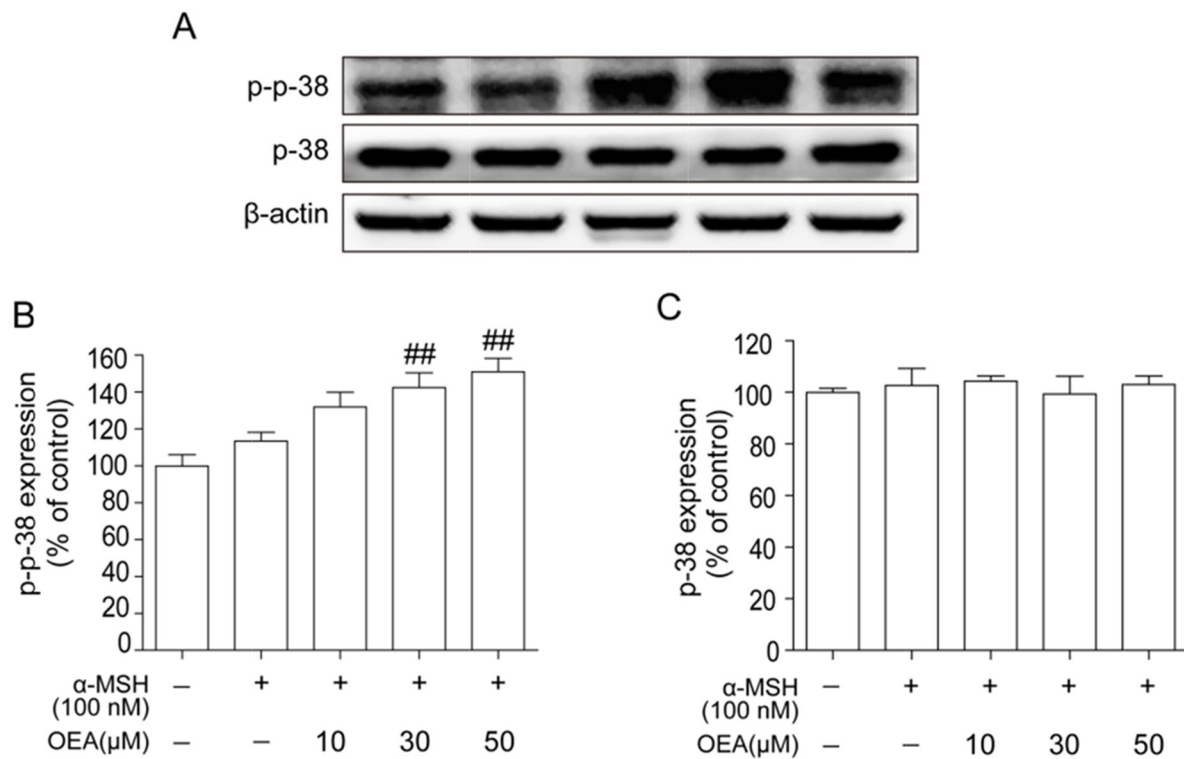

**Supplementary Figure 1: Effects of OEA on the activation of the p38 MAPK pathway in  $\alpha$ -MSH-stimulated B16 melanoma cells.** Cells were exposed to 100 nM  $\alpha$ -MSH in the presence of 10, 30, 50  $\mu$ M OEA. (A) p38 and p-p38 protein levels were examined by Western blot. (B) The data are presented as percentages compared with the control group (set to 100%) and represented as the means  $\pm$  SEM of three separate experiments performed in duplicate (n=3). <sup>##</sup>P<0.01 vs. control group.

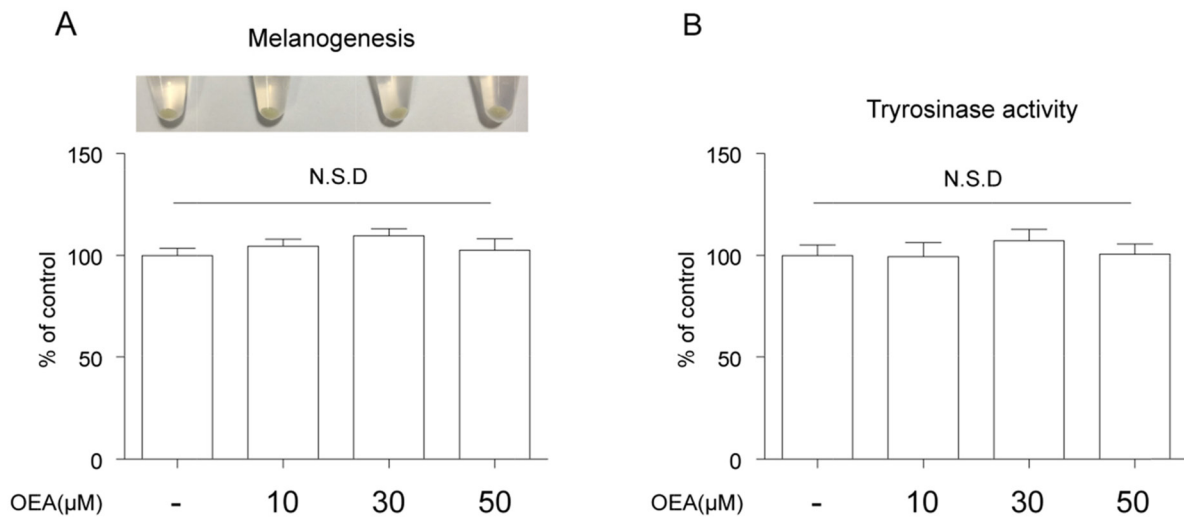

**Supplementary Figure 2: Effect of OEA on cellular melanin synthesis and tyrosinase activity in B16 cells.** Cells were treated with various concentrations of OEA for 72 h. Relative cellular melanin content (A) and tyrosinase activity (B) were measured at 72 h after treatment. The percentage values of the treated cells are expressed relative to that in control cells. Data are reported as the mean  $\pm$  SEM of three independent experiments performed in triplicate (n=3). N.S.D: no significant difference.
